# Supplementary material for: Lapachol inhibits glycolysis in cancer cells by targeting pyruvate kinase M2
Source: PubMed Central journal article supplement (PMC5796696; doi:10.1371/journal.pone.0191419), 2018-02-02
Supplement: pone.0191419.s001.pdf [file pone.0191419.s001.pdf]

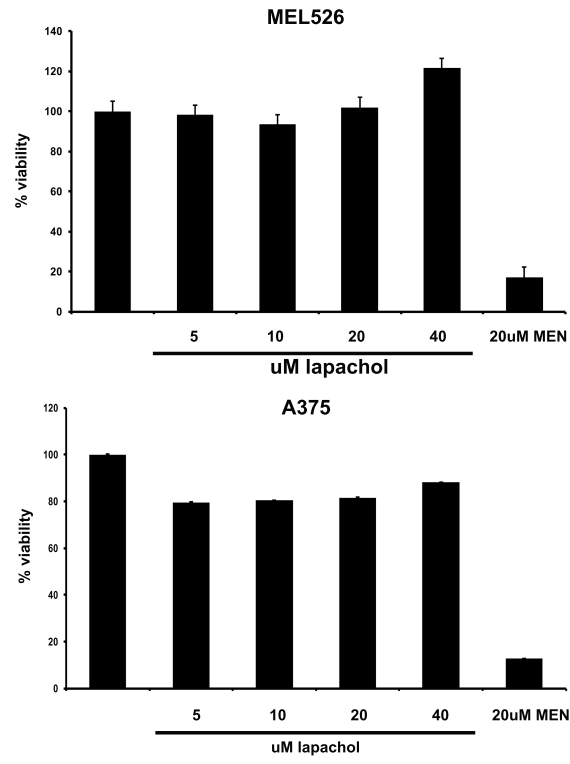

Fig S1. MEL526 or A375 cells were treated with lapachol or 20 uM menadione at 20% oxygen and cell viability shown.
