# Supplementary material for: Lapachol inhibits glycolysis in cancer cells by targeting pyruvate kinase M2
Source: PubMed Central journal article supplement (PMC5796696; doi:10.1371/journal.pone.0191419), 2018-02-02
Supplement: pone.0191419.s003.pdf [file pone.0191419.s003.pdf]

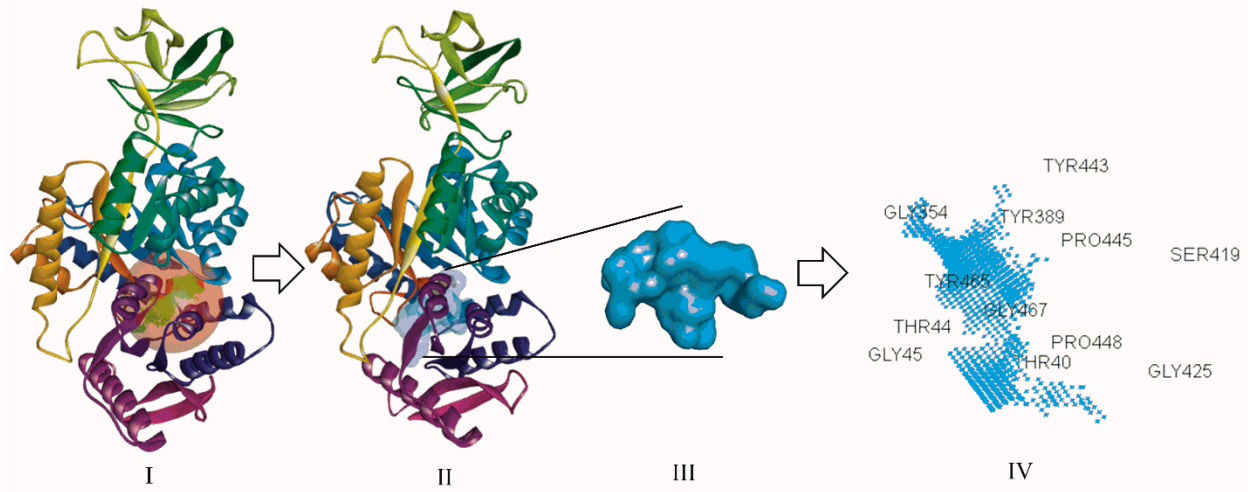

**Fig. S3** Identification of the amino acid residues available on the PKM2 receptor-binding site.

**Supplemental video files:**

1. Control: TMRM imaging of control cells.
2. Lapachol: TMRM imaging of lapachol-treated cells.
3. DNP: TMRM imaging of DNP-treated cells.
4. Lapachol+DNP: TMRM imaging of lapachol+DNP-treated cells.
